# Supplementary material for: Is the brain really a small-world network?
Source: PubMed Central journal article supplement (PMC4853440; doi:10.1007/s00429-015-1035-6), 2015-04-18
Supplement: 429_2015_1035_MOESM1_ESM.pdf [file 429_2015_1035_MOESM1_ESM.pdf]

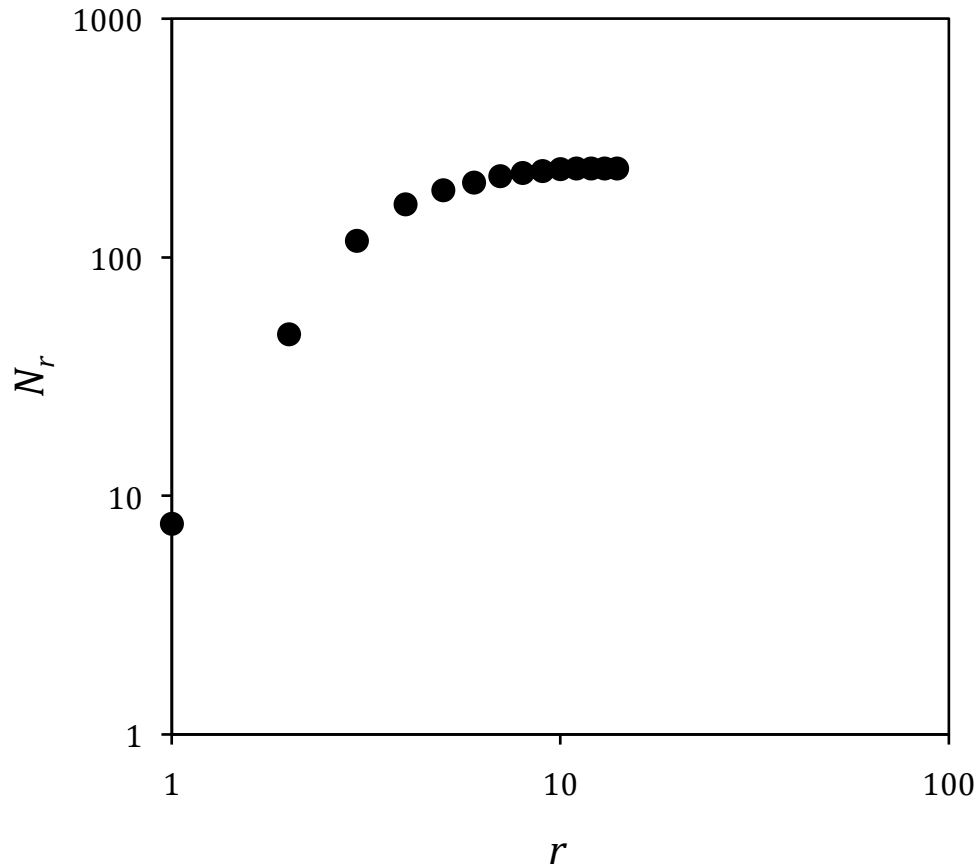

Hilgetag and Goulas (2015) Supplementary Figure. Topological dimension of the neuronal network of *C. elegans*. Average number of nodes  $N_r$  reached within  $r$  steps of starting from an initial node. The initial slope of the curve within a log-log plot suggest a finite topological dimension  $D$ , for  $N_r \sim r^D$ , rather than an infinite increase (cf. Moretti and Muñoz 2013). The asymptotic slope of the curve for larger  $r$  is due to the finite size of the network. Network data from <http://www.dynamic-connectome.org>.
